# Supplementary material for: A novel circRNA, hsa_circ_0069382, regulates gastric cancer progression
Source: Springer Nature journal article supplement (doi:10.1186/s12935-023-02871-4), 2023-02-25
Supplement: MOESM1 [file 24066974]

Figure S1

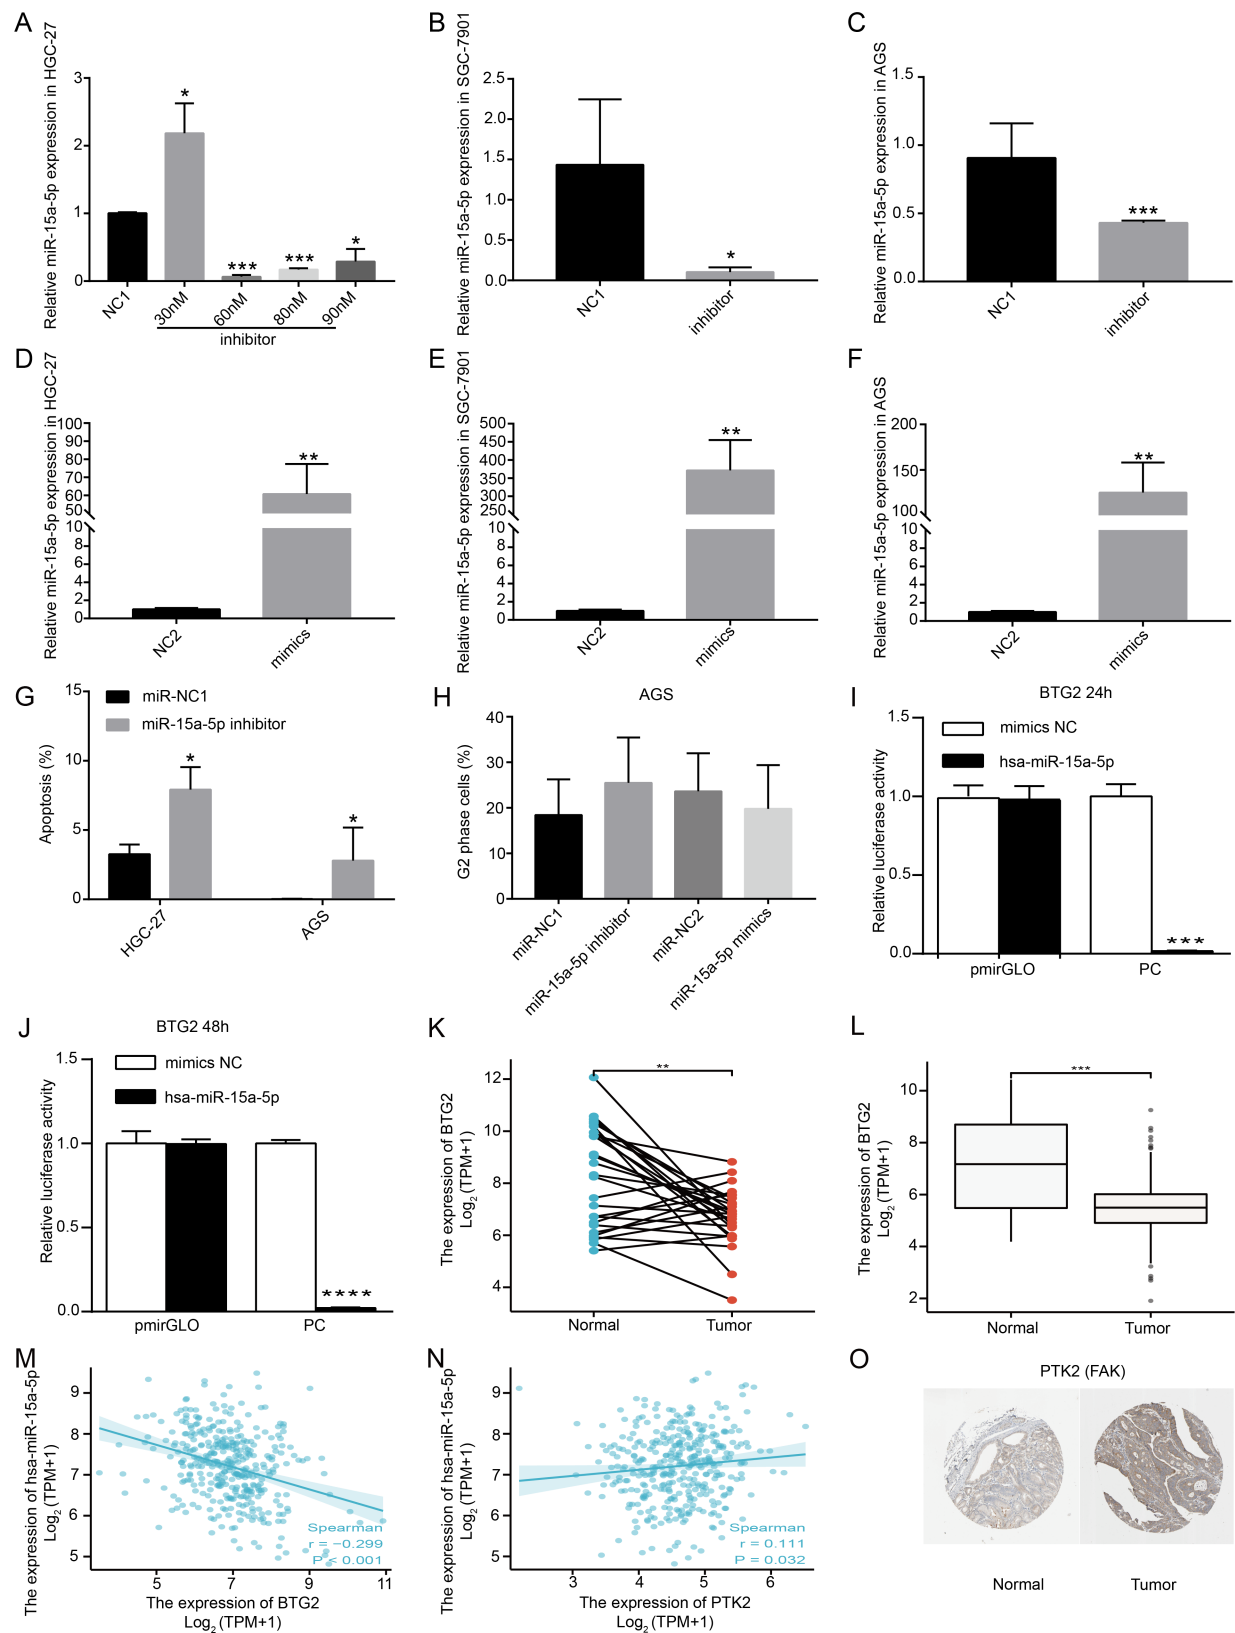

Figure S2

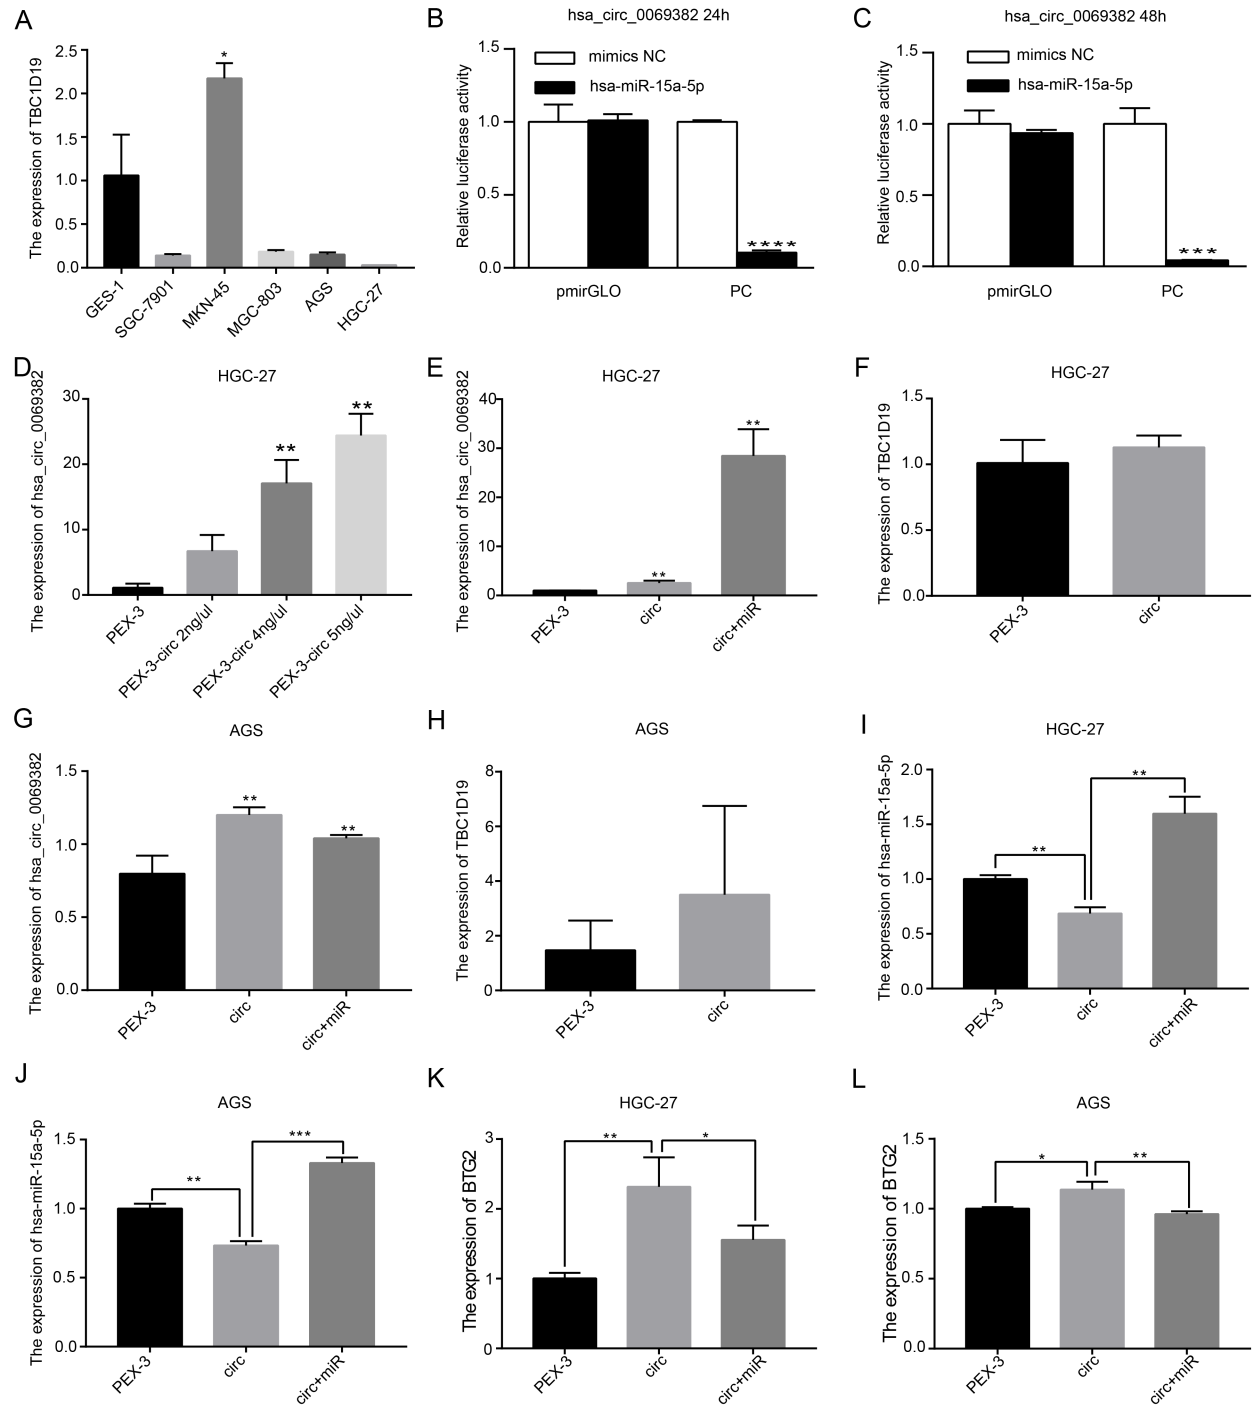

Figure S3

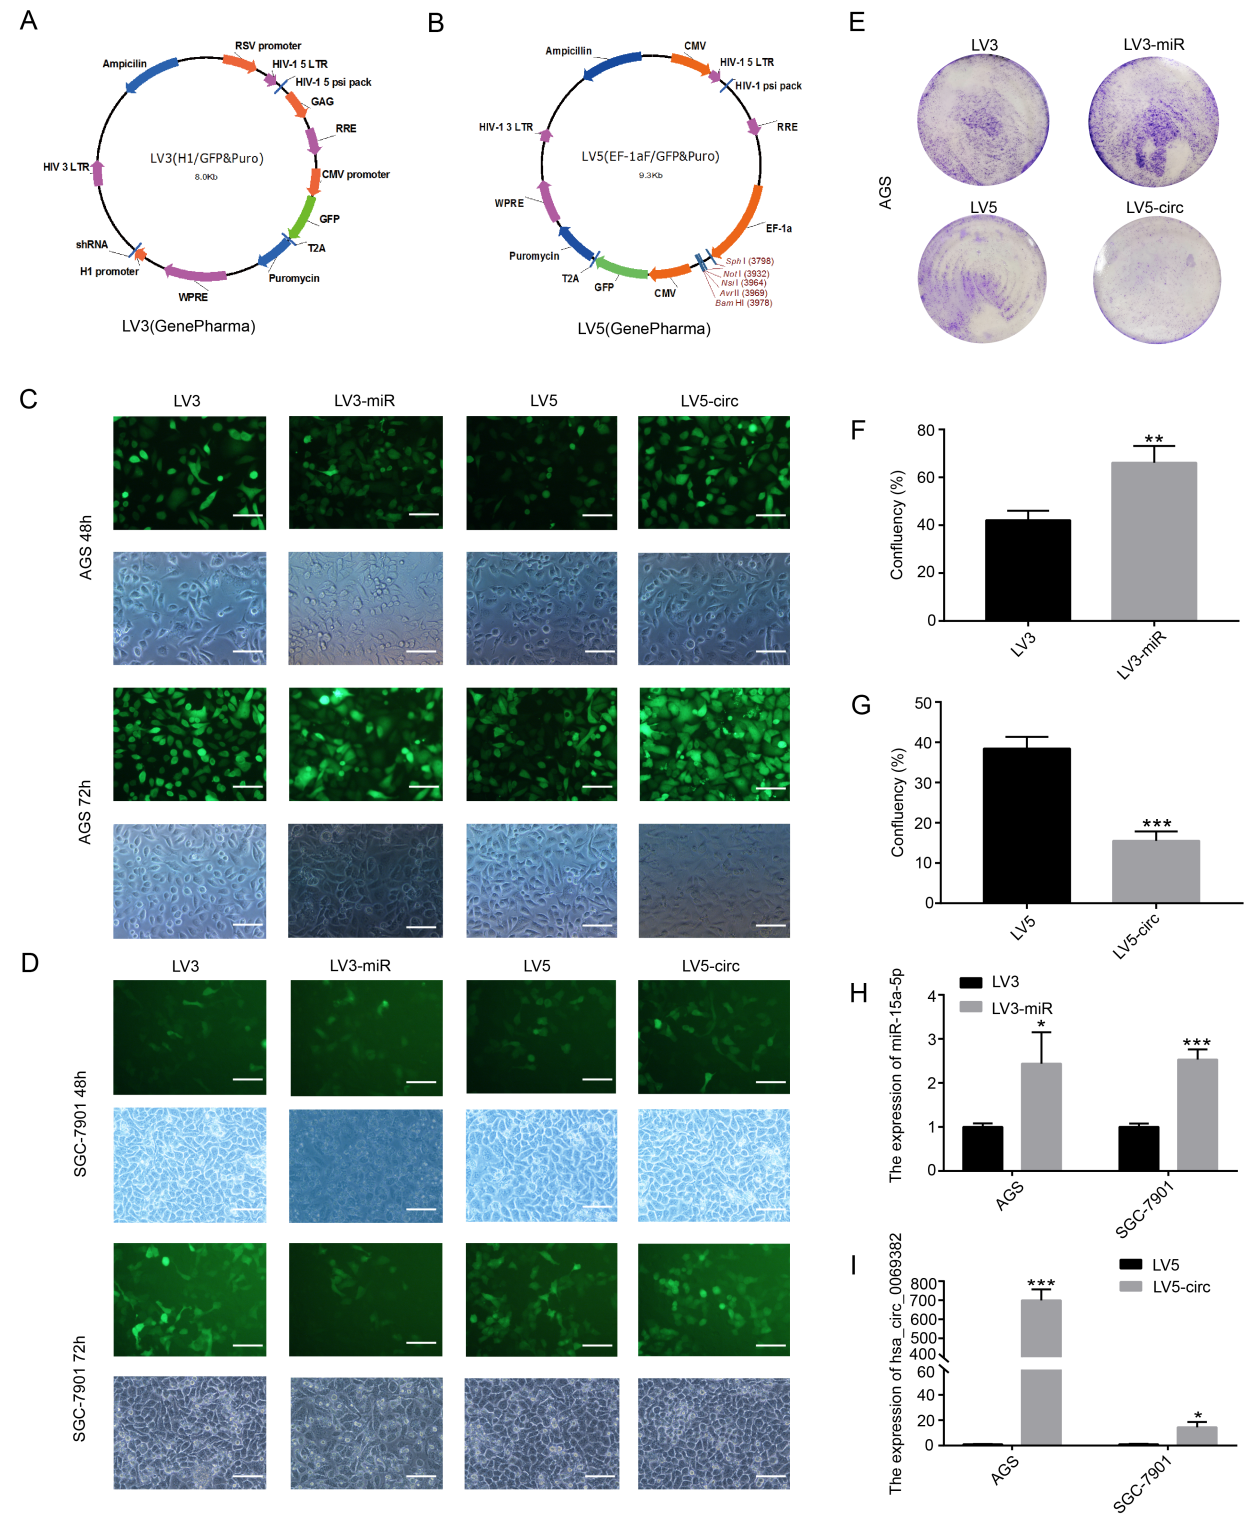

**Table S1 Target genes of miR-15a-5p**

| gene name  | fold change | p-value  | gene name | fold change | p-value  | gene name | fold change | p-value  |
|------------|-------------|----------|-----------|-------------|----------|-----------|-------------|----------|
| CCNE1      | 10.21       | 2.10E-12 | DENND6A   | 1.15        | 8.50E-03 | ZBTB10    | 1.48        | 3.80E-02 |
| SPRED1     | 1.71        | 4.20E-11 | CPEB3     | 0.71        | 2.20E-05 | SALL1     | 0.96        | 2.70E-01 |
| WNT3A      | 0.65        | 0.19     | PDCD4     | 0.67        | 5.60E-04 | NR2C2     | 1.4         | 8.90E-06 |
| LSM11      | 1.23        | 3.10E-05 | PLEKHA1   | 1.48        | 3.30E-05 | CDK6      | 4.44        | 1.10E-10 |
| WEE1       | 1.18        | 4.60E-02 | BZW1      | 1.45        | 1.60E-09 | EN2       | 16.42       | 2.50E-04 |
| CDCA4      | 2.02        | 2.00E-13 | C16orf72  | 1.12        | 3.90E-02 | OCRL      | 1.08        | 8.40E-02 |
| SLC9A6     | 1.14        | 7.30E-02 | PIM1      | 0.45        | 3.10E-10 | KIF3B     | 1.67        | 1.50E-11 |
| SNCG       | 0.47        | 1.80E-09 | RARB      | 0.74        | 1.30E-02 | ZNF367    | 3.55        | 2.40E-27 |
| UBE2V1     | 1.57        | 3.90E-09 | DDX3Y     | 0.64        | 3.30E-01 | ANKRD13B  | 2.93        | 1.70E-14 |
| FGF7       | 0.85        | 1.20E-01 | ZCCHC3    | 1.48        | 1.40E-04 | TASP1     | 1.94        | 8.70E-18 |
| CDC42SE2   | 1.37        | 1.00E-05 | DMTF1     | 1.65        | 7.80E-08 | PPM1A     | 0.76        | 4.00E-05 |
| C2orf42    | 1.18        | 5.50E-04 | RAB11FIP2 | 1           | 8.40E-01 | CDV3      | 1.23        | 1.30E-04 |
| PURA       | 0.89        | 6.10E-02 | RAD23B    | 1.3         | 1.60E-05 | NOTCH2    | 1.16        | 3.50E-02 |
| CDC37L1    | 0.98        | 5.00E-01 | RTN4      | 0.92        | 2.30E-01 | PTPRJ     | 1.92        | 2.20E-13 |
| C1orf21    | 0.65        | 8.60E-04 | MIB1      | 1.71        | 1.50E-08 | MTFR1L    | 0.63        | 1.50E-11 |
| CCND1      | 2.07        | 8.00E-08 | AP2B1     | 1.95        | 3.30E-16 | RASSF5    | 0.69        | 4.10E-01 |
| BTG2       | 0.23        | 1.70E-14 | ASH1L     | 1.2         | 7.10E-03 | CSDE1     | 0.82        | 7.10E-03 |
| AXIN2      | 2.64        | 3.10E-01 | TSPYL2    | 0.39        | 7.70E-06 | SIK1      | 0.67        | 2.50E-02 |
| SMAD7      | 1.05        | 8.80E-01 | GPATCH8   | 1.42        | 5.90E-09 | PPP1R11   | 1.01        | 7.90E-01 |
| N4BP1      | 0.92        | 7.00E-01 | FKBP1A    | 1.56        | 4.20E-11 | ZFHX4     | 0.3         | 1.90E-06 |
| CACUL1     | 1.49        | 1.70E-11 | RBBP6     | 1.32        | 2.60E-07 | UBE4A     | 1.35        | 1.40E-03 |
| CCND2      | 1.15        | 4.70E-01 | KANK1     | 0.69        | 1.00E-02 | FBXL20    | 1.34        | 1.80E-03 |
| WIPI2      | 1.28        | 4.90E-06 | E2F3      | 3.2         | 3.30E-37 | KPNA1     | 1.35        | 2.70E-10 |
| TLK1       | 1.12        | 6.20E-03 | ACVR2A    | 1.01        | 7.20E-01 | PRRC2C    | 2.07        | 2.50E-27 |
| ATG9A      | 1.17        | 1.40E-02 | LURAP1L   | 1.66        | 3.10E-04 | AMOTL1    | 0.54        | 1.90E-02 |
| KIF23      | 5.62        | 1.20E-37 | RAP2C     | 1.61        | 2.00E-12 | HOXA3     | 1.02        | 4.80E-01 |
| HMGA2      | 19.45       | 3.30E-14 | HOXA10    | 15.3        | 4.30E-20 | RBPJ      | 1.42        | 4.90E-10 |
| MOB4       | 1.08        | 8.80E-02 | BCL7A     | 2.16        | 3.80E-15 | MLLT6     | 1.34        | 6.30E-03 |
| VEGFA      | 2.39        | 7.50E-09 | APP       | 1.24        | 2.10E-03 | CTDSPL    | 1.23        | 1.80E-02 |
| MAFK       | 1.31        | 6.50E-03 | BCL2      | 0.64        | 1.60E-05 | TLE4      | 0.59        | 2.80E-08 |
| PEX13      | 1.32        | 6.10E-07 | PDIK1L    | 1.75        | 8.00E-12 | MTMR4     | 1.45        | 2.10E-06 |
| SHOC2      | 1.21        | 3.80E-03 | YAP1      | 1.2         | 1.30E-02 | SMURF1    | 1.67        | 1.80E-07 |
| RNF138     | 1.56        | 1.20E-08 | CUL2      | 1.49        | 9.10E-11 | AMOT      | 2.04        | 1.30E-02 |
| CAPZA2     | 1.24        | 1.40E-01 | PAG1      | 1.66        | 8.60E-06 | WNK3      | 0.7         | 1.20E-01 |
| RUNX1T1    | 0.74        | 1.20E-01 | PPP6C     | 1.22        | 0.000.14 | ATP13A3   | 2.78        | 4.10E-25 |
| PLAG1      | 1.88        | 3.60E-01 | YTHDC1    | 1.19        | 2.50E-05 | KPNA3     | 1.49        | 1.30E-09 |
| AMER1      | 1.15        | 3.50E-01 | CREBRF    | 0.96        | 5.80E-01 | CREBL2    | 1.04        | 9.60E-01 |
| CRKL       | 1.42        | 2.10E-07 | PISD      | 1.46        | 4.40E-10 | STXBP3    | 1.43        | 2.70E-03 |
| CHEK1      | 3.61        | 7.80E-29 | JARID2    | 1.07        | 5.80E-01 | PPP6R3    | 1.47        | 1.20E-08 |
| EM189-UBE2 | 1.16        | 1.10E-01 | EFNB2     | 1.35        | 9.10E-03 | TAOK1     | 1.5         | 1.10E-08 |
| RPS6KA3    | 1.59        | 1.30E-07 | NUP50     | 1.6         | 1.90E-12 | PTPRD     | 0.84        | 5.00E-03 |
| FGF2       | 0.36        | 5.10E-06 | YWHAQ     | 1.2         | 6.10E-04 | TBL1XR1   | 2.17        | 3.00E-18 |
| FASN       | 2           | 3.20E-09 | PRKAR2A   | 1.24        | 8.10E-03 | UBR3      | 1.15        | 1.90E-03 |
| HSPA4L     | 1.02        | 8.70E-01 | CBFA2T3   | 0.68        | 1.30E-04 | ACTR1A    | 0.88        | 6.50E-03 |
| UBE2Q1     | 1.51        | 1.30E-13 | ZBTB33    | 2.09        | 7.50E-23 | FAM122B   | 2.59        | 1.40E-17 |
| ACTR2      | 1.57        | 1.80E-16 | B4GALT1   | 1.44        | 6.90E-05 | CHIC1     | 0.83        | 3.60E-02 |
| CCNT2      | 1.65        | 3.10E-10 | PNISR     | 1.22        | 1.70E-02 | RIMS3     | 0.58        | 1.80E-05 |
| TBPL1      | 1.25        | 9.60E-04 | TSC22D2   | 0.82        | 3.80E-02 | LRRFIP2   | 0.96        | 4.40E-01 |
| YWHAH      | 1.22        | 9.00E-05 | MAP2K3    | 1.05        | 2.60E-01 | MKX       | 0.55        | 4.70E-02 |
| E2F7       | 5.47        | 1.70E-29 | PANK1     | 1.22        | 7.80E-03 | MYO5A     | 1.22        | 3.80E-01 |
| ENTPD7     | 1.03        | 2.40E-05 | BACE1     | 1.08        | 5.90E-01 | ZNF704    | 1.03        | 3.00E-01 |
| GABARAPL1  | 0.54        | 1.30E-07 | CRIM1     | 1.12        | 9.90E-02 | TRAM1     | 1.88        | 1.70E-13 |
| PAFAH1B1   | 0.96        | 2.80E-01 | SLC25A22  | 2.02        | 3.20E-12 | USP31     | 1.75        | 5.20E-20 |
| RECK       | 0.52        | 5.10E-06 | HOXC8     | 17.35       | 9.50E-27 | NAA25     | 2.28        | 2.40E-28 |
| CPEB2      | 0.68        | 1.00E-06 | SOX5      | 0.55        | 1.20E-04 | CD2AP     | 1.72        | 9.90E-09 |
| SNX16      | 1.14        | 3.40E-02 | EZH1      | 0.72        | 7.80E-03 | OGT       | 2.08        | 3.10E-12 |
| ZNF449     | 1.43        | 7.10E-08 | SIDT2     | 0.57        | 1.70E-08 | DDX3X     | 1.16        | 2.50E-02 |
| AGO4       | 1.05        | 5.10E-01 | SERBP1    | 1.44        | 1.70E-11 | ATG14     | 1.14        | 5.30E-03 |
| STRADB     | 0.75        | 1.30E-01 | RET       | 1.39        | 1.10E-01 | SREK1     | 1.63        | 1.50E-11 |
| CDK17      | 1.27        | 8.80E-04 | AFF4      | 1.04        | 7.90E-01 | CDS2      | 0.9         | 7.10E-01 |
| BDNF       | 2.13        | 1.80E-03 | HMBOX1    | 1.23        | 1.50E-02 | USP15     | 1.37        | 1.00E-05 |
| CARM1      | 1.36        | 5.20E-05 | TMEM135   | 1.43        | 3.80E-06 | ETNK1     | 1.55        | 2.10E-05 |
| LUZP1      | 1.08        | 3.60E-02 | PIK3R1    | 0.95        | 9.40E-01 | SRPK1     | 2.21        | 9.60E-23 |
| CDC27      | 1.67        | 3.90E-16 | PSAT1     | 2.96        | 3.30E-07 | NUFIP2    | 1.94        | 2.90E-23 |
| HMGA1      | 2.24        | 1.80E-14 | CLCN3     | 1.43        | 2.80E-04 | SYPL1     | 1.26        | 8.90E-03 |
| CCNYL1     | 0.96        | 4.30E-01 | CAMSAP1   | 1.13        | 3.50E-04 | DICER1    | 1.3         | 1.40E-04 |
| USP3       | 1.46        | 2.30E-08 | LAMC1     | 1.16        | 4.80E-03 | CADM1     | 1.07        | 2.20E-02 |

**Table S2 The clinical features of 68 gastric cancer patients**

| NO. | Gender | Age | differentiation | Clinical TNM stage | Lauren classification         |
|-----|--------|-----|-----------------|--------------------|-------------------------------|
| 1   | male   | 63  | poorly          | T3N3aMx            | diffuse-type                  |
| 2   | male   | 90  | poorly          | T4aN3Mx            | diffuse-type                  |
| 3   | male   | 64  | moderate-poorly | T3N2Mx             | diffuse-type+ intestinal-type |
| 4   | male   | 53  | moderate-poorly | T4N0Mx             | diffuse-type+ intestinal-type |
| 5   | female | 62  | unknow          | T4N0Mx             |                               |
| 6   | male   | 76  | poorly          | T3N0Mx             |                               |
| 7   | female | 65  | moderate-poorly | T3N0Mx             | intestinal-type               |
| 8   | male   | 76  | poorly          | T3N3aMx            | intestinal-type +diffuse-type |
| 9   | male   | 70  | poorly          | T3N0Mx             | diffuse-type                  |
| 10  | female | 69  | moderate-poorly | T1bN0Mx            | intestinal-type               |
| 11  | male   | 40  | poorly          | T3N3aMx            | diffuse-type                  |
| 12  | male   | 51  | moderate-poorly | T3N3aMx            |                               |
| 13  | female | 74  | moderate-poorly | T4aN2Mx            | mixed-type                    |
| 14  | female | 45  | poorly          | T1aN0Mx            | diffuse-type                  |
| 15  | female | 66  | moderate-poorly | T3N1Mx             | diffuse-type                  |
| 16  | female | 52  | poorly          | T3N0Mx             | diffuse-type                  |
| 17  | female | 36  | poorly          | T2N3aMx            | diffuse-type                  |
| 18  | female | 56  | moderate-poorly | T3N2Mx             | mixed-type                    |
| 19  | female | 82  | moderate-poorly | T4N1Mx             |                               |
| 20  | female | 73  | moderate-poorly | T3N2Mx             | intestinal-type               |
| 21  | male   | 71  | moderate-poorly | T2N2Mx             | intestinal-type+diffuse-type  |
| 22  | male   | 67  | moderate-poorly | T4aN1Mx            | mixed-type                    |
| 23  | male   | 64  | moderate-poorly | T4aN2Mx            | mixed-type                    |
| 24  | male   | 73  | moderate-poorly | T3N3aMx            | diffuse-type                  |
| 25  | male   | 53  | poorly          | T4aN3bMx           | diffuse-type                  |
| 26  | male   | 56  | moderate-poorly | T4aN3aMx           | mixed-type                    |
| 27  | male   | 55  | moderate-poorly | T4bN2Mx            | diffuse-type                  |
| 28  | male   | 80  | poorly          | T2N0Mx             | diffuse-type                  |
| 29  | male   | 45  | moderate        | T1bN0Mx            | intestinal-type               |
| 30  | male   | 70  | moderate-poorly | T3N3aMx            | diffuse-type                  |
| 31  | male   | 84  | poorly          |                    | diffuse-typegastric cancer    |
| 32  | male   | 64  | unknow          | T3N0Mx             |                               |
| 33  | male   | 80  | moderate-poorly | T3N3aMx            | diffuse-type+ intestinal-type |
| 34  | male   | 75  | moderate-poorly | T2N1Mx             | intestinal-type +diffuse-type |
| 35  | male   | 54  | poorly          | T4aN3Mx            | intestinal-type +diffuse-type |
| 36  | male   | 55  | poorly          | T3N2Mx             | mixed-type                    |
| 37  | male   | 80  | moderate-poorly | T1aN0Mx            | intestinal-type+diffuse-type  |
| 38  | male   | 71  | moderate-poorly | T4aN3aMx           | intestinal-type+diffuse-type  |
| 39  | male   | 57  | poorly          | T4aN3Mx            |                               |
| 40  | male   | 65  | moderate-poorly | T3N0Mx             |                               |
| 41  | female | 69  | moderate-poorly | T4aN2Mx            |                               |
| 42  | male   | 57  | moderate-poorly | T4N3Mx             |                               |
| 43  | male   | 70  | moderate-poorly | T4N2Mx             |                               |
| 44  | male   | 72  | moderate        | T4aN0Mx            |                               |
| 45  | female | 56  | poorly          | T4N3Mx             |                               |
| 46  | female | 64  | unknow          | T3N2Mx             |                               |
| 47  | male   | 57  | moderate        | T2N0Mx             |                               |
| 48  | male   | 64  | poorly          | T4N2Mx             |                               |
| 49  | male   | 58  | unknow          | T4aN2bMx           |                               |
| 50  | male   | 69  | poorly          | T3N2Mx             |                               |
| 51  | female | 69  | poorly          | T4aN3bMx           |                               |
| 52  | male   | 78  | moderate-poorly | T4N2M1             |                               |
| 53  | male   | 64  | moderate-poorly | T3N2Mx             | intestinal-type               |
| 54  | female | 53  | moderate-poorly | T3N0Mx             | mixed-type                    |

|    |        |    |                 |         |                 |
|----|--------|----|-----------------|---------|-----------------|
| 55 | male   | 57 | moderate-poorly | T1bN0Mx | mixed-type      |
| 56 | male   | 53 | moderate-poorly | T4aN2Mx | mixed-type      |
| 57 | male   | 66 | moderate        | T1bN1Mx | intestinal-type |
| 58 | male   | 72 | moderate        | T2N3aMx | intestinal-type |
| 59 | male   | 68 | moderate-poorly | T3N1Mx  | mixed-type      |
| 60 | female | 52 | poorly          | T3N0Mx  | diffuse-type    |
| 61 | female | 31 | poorly          | T1bN0Mx | diffuse-type    |
| 62 | male   | 76 | poorly          | T3N3aMx | diffuse-type    |
| 63 | male   | 68 | moderate-poorly | T3N3aMx | mixed-type      |
| 64 | male   | 44 | poorly          | T2N2Mx  | diffuse-type    |
| 65 | male   | 52 | poorly          | T4aN2Mx | diffuse-type    |
| 66 | male   | 71 | moderate-poorly | T3N0Mx  | mixed-type      |
| 67 | male   | 47 | moderate-poorly | T3N2Mx  | mixed-type      |
| 68 | male   | 76 | moderate-poorly | T2N1Mx  | mixed-type      |



| <b>Table S4 Predicted upstream transcription factors of hsa circ 0069382</b> |             |                   |
|------------------------------------------------------------------------------|-------------|-------------------|
| DB toolkit                                                                   | Animal TFDB | intersection (58) |
| GRHL3                                                                        | ZNF143      | SMARCA4           |
| SALL4                                                                        | ZNF384      | KDM1A             |
| SOX2                                                                         | MAZ         | POU5F1            |
| SMAD1                                                                        | SMARCA4     | CDX2              |
| CBX3                                                                         | KDM1A       | BMI1              |
| PTTG1                                                                        | ZNF92       | FOXM1             |
| NKX3-1                                                                       | FOXP1       | EP300             |
| BIRA                                                                         | NOTCH1      | TRIM28            |
| ZNF649                                                                       | MAFF        | FOXA1             |
| TRIM28                                                                       | POU5F1      | NKX3-1            |
| DDX20                                                                        | EHF         | MED1              |
| H3F3B                                                                        | SP1         | BRD4              |
| DPF1                                                                         | CDX2        | ESR1              |
| CHD7                                                                         | BMI1        | MYC               |
| BCL11A                                                                       | HLTF        | FOXJ2             |
| ZC3H8                                                                        | ZNF148      | RXRA              |
| IRF9                                                                         | ZNF281      | AR                |
| OTX2                                                                         | ZNF263      | TRIM24            |
| SMAD3                                                                        | TBX10       | EWSR1             |
| ZNF823                                                                       | TAF1        | SPI1              |
| ZNF586                                                                       | FOXM1       | RELA              |
| SETDB1                                                                       | PRDM1       | SETDB1            |
| POU5F1                                                                       | CTBP2       | GATA1             |
| GATA4                                                                        | EP300       | CBX3              |
| HINFP                                                                        | IRF1        | POLR2A            |
| ATF4                                                                         | FOXF1       | ATF2              |
| ZNF490                                                                       | NR2C2       | NANOG             |
| SMAD2                                                                        | ZFHX3       | TCF7L2            |
| AR                                                                           | TRIM28      | ATF3              |
| SUMO2                                                                        | REST        | TEAD4             |
| ZNF765                                                                       | SOX18       | CBX1              |
| ERCC6                                                                        | FOXA2       | HOXB13            |
| ZNF318                                                                       | HOXB9       | ERG               |
| ID3                                                                          | C17orf96    | LMNB1             |
| ZNF675                                                                       | RFX3        | SMAD1             |
| ZNF585B                                                                      | DBP         | BCL11A            |
| GATA1                                                                        | TRIM63      | SOX2              |
| FOXO1                                                                        | NFIC        | SMAD3             |
| DIDO1                                                                        | ARNT        | LEF1              |
| DEK                                                                          | NFIL3       | OTX2              |
| NANOG                                                                        | POU3F2      | GRHL3             |
| BRD4                                                                         | GATA3       | GATA4             |
| NUP98-HOXA                                                                   | RREB1       | USF2              |
| CHAMP1                                                                       | EZH2        | NR4A1             |
| TEAD4                                                                        | NFE2L2      | SALL4             |
| MEF2D                                                                        | TP53        | IRF9              |
| ZNF24                                                                        | STAT1       | SUMO2             |
| ZNF324                                                                       | BACH2       | CHD7              |
| GATA6                                                                        | STAT3       | ELF1              |
| ZNF793                                                                       | MAFK        | ZC3H8             |
| ZNF175                                                                       | BRCA1       | FOXH1             |
| PBX3                                                                         | MAF         | FOXO1             |
| PRDM14                                                                       | SRF         | GATA6             |
| NR4A1                                                                        | MEF2C       | PBX3              |
| NFRKB                                                                        | FOXA1       | FEZF1             |
| ESR1                                                                         | NKX3-1      | NIPBL             |



|         |             |       |
|---------|-------------|-------|
| RELA    | NKX2-3      | PIAS1 |
| KDM1A   | MED1        | BACH1 |
| BACH1   | SP4         |       |
| FEZF1   | BRD4        |       |
| CUX1    | ZNF219      |       |
| ZNF83   | PROP1       |       |
| NIPBL   | SOX17       |       |
| ZNF486  | ESR1        |       |
| NKRF    | BHLHE40     |       |
| ZNF248  | MYC         |       |
| SSU72   | NFE2        |       |
| ZNF182  | FOXJ2       |       |
| NBN     | SP2         |       |
| ARID1A  | BRD2        |       |
| RAD51   | SUZ12       |       |
| LMNB1   | STAT2       |       |
| EP300   | RXRA        |       |
| ELF1    | JUND        |       |
| FOXH1   | YY1         |       |
| ERG     | AR          |       |
| LEF1    | MAFG        |       |
| MED1    | VDR         |       |
| PIAS1   | KDM5B       |       |
| RXRA    | NR2F2       |       |
| SPI1    | PURA        |       |
| ZNF280A | ELK1        |       |
| CDX2    | CBFB        |       |
| MTA2    | FLI1        |       |
| ZNF506  | JUN         |       |
| ZNF84   | MECOM       |       |
| FOXA1   | TRIM24      |       |
| POLR2A  | FOXD3       |       |
| ATF3    | TEAD1       |       |
| TRIM24  | GTF3C2      |       |
| POLR2H  | EWSR1       |       |
| HMBOX1  | PBX1        |       |
| ATF2    | CREB1       |       |
| FOXM1   | NPAT        |       |
| ZNF580  | GTF2I       |       |
| E2F8    | KLF1        |       |
| ZNF644  | STAT2:STAT1 |       |
| HOXB13  | SPI1        |       |
| FOXJ2   | FOXQ1       |       |
| USF2    | RELA        |       |
| TCF7L2  | SETDB1      |       |
| ZNF589  | HNF1A       |       |
| BMI1    | SP7         |       |
| MYC     | KLF5        |       |
| SMARCE1 | PGR         |       |
| ZIM3    | RARA        |       |
| EWSR1   | KLF4        |       |
| SCRT1   | LEF1:TCF1   |       |
| CBX1    | GATA1       |       |
| ZNF146  | CBX3        |       |
| ERCC2   | IRF2        |       |
| SMARCA4 | FOKK1       |       |
| SMAD2/3 | SIN3A       |       |
|         | TBP         |       |

|  |                   |  |
|--|-------------------|--|
|  | ZNF250            |  |
|  | HOXA13            |  |
|  | LIN54             |  |
|  | SP3               |  |
|  | AIRE              |  |
|  | SMAD4             |  |
|  | POLR2A            |  |
|  | HOXA7             |  |
|  | BCL6              |  |
|  | HNF4A             |  |
|  | HEY1              |  |
|  | HSF1              |  |
|  | ATF2              |  |
|  | NANOG             |  |
|  | HLF               |  |
|  | TAL1              |  |
|  | RXRG              |  |
|  | ZNF274            |  |
|  | TCF7L2            |  |
|  | KLF11             |  |
|  | LCOR              |  |
|  | IRF4              |  |
|  | PML               |  |
|  | GATA2             |  |
|  | RUNX1             |  |
|  | HDAC2             |  |
|  | SMAD2:SMAD3:SMAD4 |  |
|  | POU1F1            |  |
|  | ATF3              |  |
|  | WHSC1             |  |
|  | FOXC1             |  |
|  | STAT6             |  |
|  | ARRB1             |  |
|  | NFATC1            |  |
|  | ETS1              |  |
|  | FOXO3             |  |
|  | TCF4              |  |
|  | POLR3A            |  |
|  | PPARD/PPARG       |  |
|  | GABPA             |  |
|  | PLAG1             |  |
|  | RUNX2             |  |
|  | TP73              |  |
|  | TEAD4             |  |
|  | CEBPG             |  |
|  | SOX9              |  |
|  | E2F7              |  |
|  | ZBTB7B            |  |
|  | PPARG:RXRA        |  |
|  | NR2F1             |  |
|  | COUP-TF:HNF4      |  |
|  | EZH1              |  |
|  | FOXF2             |  |
|  | ARID3A            |  |
|  | CEBPA             |  |
|  | FUBP1             |  |
|  | EPAS1             |  |
|  | CBX1              |  |

|  |             |  |
|--|-------------|--|
|  | E2F4        |  |
|  | REX1        |  |
|  | DDX5        |  |
|  | IRF3        |  |
|  | HOXB13      |  |
|  | NR3C1       |  |
|  | E4F1        |  |
|  | FOXA3       |  |
|  | PATZ1       |  |
|  | FOXP2       |  |
|  | VDR:CAR:PXR |  |
|  | TCF12       |  |
|  | IRF5        |  |
|  | HNF1B       |  |
|  | CENPA       |  |
|  | EGR1        |  |
|  | ERG         |  |
|  | TEAD3       |  |
|  | NCOR1       |  |
|  | SOX13       |  |
|  | KLF7        |  |
|  | POU2F3      |  |
|  | GLYR1       |  |
|  | LMNB1       |  |
|  | PPARG       |  |
|  | TCF3        |  |
|  | VEZF1       |  |
|  | SREBF1      |  |
|  | NR6A1       |  |
|  | POU4F3      |  |
|  | POU4F1      |  |
|  | ELF2        |  |
|  | RBL2        |  |
|  | ZNF740      |  |
|  | MZF1        |  |
|  | NFE2L1      |  |
|  | KLF15       |  |
|  | SMAD1       |  |
|  | ZIC1        |  |
|  | FOXI1       |  |
|  | BRD3        |  |
|  | TFAP2D      |  |
|  | MAX         |  |
|  | BCL11A      |  |
|  | SOX2        |  |
|  | OTP         |  |
|  | SPIC        |  |
|  | NR5A2       |  |
|  | GMEB2       |  |
|  | CHD1        |  |
|  | BCOR        |  |
|  | MITF        |  |
|  | FOXJ3       |  |
|  | RNF2        |  |
|  | BARX2       |  |
|  | FOXL1       |  |
|  | BTAF1       |  |
|  | NFYB        |  |

|  |             |  |
|--|-------------|--|
|  | SMAD3       |  |
|  | ARNT2       |  |
|  | GLI1        |  |
|  | IRF7        |  |
|  | LEF1        |  |
|  | RFX7        |  |
|  | CDK8        |  |
|  | LHX2        |  |
|  | ETV4        |  |
|  | MEF2A       |  |
|  | POU2F1      |  |
|  | ZFP42       |  |
|  | BDP1        |  |
|  | SOX14       |  |
|  | RFX5        |  |
|  | RUNX3       |  |
|  | ZFY         |  |
|  | PCGF2       |  |
|  | ZBTB33      |  |
|  | NANOGP1     |  |
|  | TBR1        |  |
|  | ZBTB17      |  |
|  | CPEB1       |  |
|  | RFX2        |  |
|  | OTX2        |  |
|  | HMGA2       |  |
|  | ELF5        |  |
|  | RARB        |  |
|  | ZNF713      |  |
|  | SREBF2      |  |
|  | STAT5B      |  |
|  | MTA3        |  |
|  | GRHL3       |  |
|  | MYOD1       |  |
|  | ZIC2        |  |
|  | KAT8        |  |
|  | HOXA11      |  |
|  | HOXC10      |  |
|  | CREBBP      |  |
|  | LTF         |  |
|  | SUMO2/SUMO3 |  |
|  | USF1        |  |
|  | NKX6-1      |  |
|  | NFYA        |  |
|  | HMG20B      |  |
|  | NR1D1       |  |
|  | NKX2-2      |  |
|  | FOXP4       |  |
|  | GATA4       |  |
|  | E2F1        |  |
|  | USF2        |  |
|  | NR4A1       |  |
|  | TBX2        |  |
|  | ZNF410      |  |
|  | ETS2        |  |
|  | 44531       |  |
|  | CREM        |  |
|  | SALL4       |  |

|  |                 |  |
|--|-----------------|--|
|  | ZNF784          |  |
|  | ZNF202          |  |
|  | TBX5            |  |
|  | CEBPD           |  |
|  | HOXA1           |  |
|  | PDX1            |  |
|  | ENSG00000234254 |  |
|  | FOSL1           |  |
|  | TBL1XR1         |  |
|  | CDX4            |  |
|  | SPIB            |  |
|  | TAF3            |  |
|  | NR1H4           |  |
|  | SMARCC1         |  |
|  | HOXD13          |  |
|  | IRF8            |  |
|  | PRAME           |  |
|  | IRF9            |  |
|  | TGIF2LY         |  |
|  | CDX1            |  |
|  | L3MBTL2         |  |
|  | NCOR2           |  |
|  | GTF2A1:GTF2A2   |  |
|  | SUMO2           |  |
|  | POU3F3          |  |
|  | CHD7            |  |
|  | FOXO6           |  |
|  | OLIG2           |  |
|  | PAX5            |  |
|  | PXR:RXR         |  |
|  | RUNX1T1         |  |
|  | EOMES           |  |
|  | ZNF691          |  |
|  | MEIS1           |  |
|  | ELL2            |  |
|  | MYB             |  |
|  | CEBPB           |  |
|  | HOXD4           |  |
|  | FOS             |  |
|  | HDAC3           |  |
|  | TGIF2LX         |  |
|  | NR4A2           |  |
|  | PPARA           |  |
|  | NF1A            |  |
|  | HIF1A           |  |
|  | ASCL2           |  |
|  | LMO2            |  |
|  | LYL1            |  |
|  | MXI1            |  |
|  | SAP30           |  |
|  | STAT5A          |  |
|  | NR1D2           |  |
|  | RARG            |  |
|  | SRC             |  |
|  | CDK9            |  |
|  | EGR4            |  |
|  | ZKSCAN1         |  |
|  | KLF3            |  |

|  |              |  |
|--|--------------|--|
|  | ICE1         |  |
|  | ELF1         |  |
|  | POU6F2       |  |
|  | EBF1         |  |
|  | MYBL2        |  |
|  | RAC3         |  |
|  | HOXD10       |  |
|  | FOXP3        |  |
|  | ICE2         |  |
|  | HOXA9        |  |
|  | IKZF1        |  |
|  | DMRTA2       |  |
|  | TBX4         |  |
|  | CTCF         |  |
|  | HES4         |  |
|  | AL844527     |  |
|  | PPARGC1A     |  |
|  | TBX22        |  |
|  | POU6F1       |  |
|  | PAX3         |  |
|  | T            |  |
|  | NR3C2        |  |
|  | CDC5L        |  |
|  | HOXD9        |  |
|  | ZC3H8        |  |
|  | FOXH1        |  |
|  | NKX6-3       |  |
|  | FOXO1        |  |
|  | TAL1:TCF3    |  |
|  | GATA6        |  |
|  | ETV1         |  |
|  | SMAD2/SMAD3  |  |
|  | ZNF280D      |  |
|  | RXRB         |  |
|  | TFAP4        |  |
|  | NR2E3        |  |
|  | GLI2         |  |
|  | SRY          |  |
|  | NR2C1        |  |
|  | SMARCC2      |  |
|  | TEF          |  |
|  | BCL3         |  |
|  | MEIS1B:HOXA9 |  |
|  | NFYC         |  |
|  | PBX3         |  |
|  | CCNT2        |  |
|  | NFATC2       |  |
|  | GSX2         |  |
|  | PRDM16       |  |
|  | NFATC3       |  |
|  | ORC1         |  |
|  | FEZF1        |  |
|  | NKX2-1       |  |
|  | ZNF35        |  |
|  | RBPJ         |  |
|  | PHOX2A       |  |
|  | NIPBL        |  |
|  | HOXB1        |  |

|  |         |  |
|--|---------|--|
|  | VTN     |  |
|  | ISL1    |  |
|  | SOX15   |  |
|  | HMGA1   |  |
|  | STAG1   |  |
|  | NRF1    |  |
|  | RFX4    |  |
|  | PIAS1   |  |
|  | FOXO4   |  |
|  | ELK3    |  |
|  | HOXD8   |  |
|  | MEOX2   |  |
|  | DMRTA1  |  |
|  | TBX15   |  |
|  | HCFC1   |  |
|  | HOXA10  |  |
|  | RORA    |  |
|  | TCF7    |  |
|  | HLX     |  |
|  | OLIG3   |  |
|  | HOXC11  |  |
|  | MAFB    |  |
|  | TLX1    |  |
|  | E2F6    |  |
|  | ESRRG   |  |
|  | ETV6    |  |
|  | NEUROD1 |  |
|  | NR1I2   |  |
|  | NEUROG3 |  |
|  | SOX1    |  |
|  | ISGF3   |  |
|  | BACH1   |  |
|  | CBX4    |  |
|  | NF1     |  |
|  | NFAT5   |  |
|  | FOXN3   |  |
|  | HOXA2   |  |
|  | ESRRA   |  |
|  | LRH1    |  |
|  | DMRT3   |  |
|  | NFIB    |  |
|  | MSX2    |  |
|  | PRRX2   |  |
|  | LIN9    |  |
|  | RB1     |  |
|  | ONECUT1 |  |
|  | GTF2B   |  |
|  | GATA5   |  |
|  | TCF7L1  |  |
|  | RAD21   |  |
|  | CREB5   |  |
|  | PRKDC   |  |

| <b>Table S5 Primers used for qRT-PCR</b> |                                   |
|------------------------------------------|-----------------------------------|
| miR-15a-5p-F                             | CGTAGCAGCACATAATGGTTTGTG          |
| miR-15a-5p-R                             | Universal primer (Taraka, 638313) |
| U6-F                                     | GGAACGATACAGAGAAGATTAGC           |
| U6-R                                     | TGGAACGCTTCACGAATTTGCG            |
| GAPDH-F                                  | ACAACCTTTGGTATCGTGGAAGG           |
| GAPDH-R                                  | GCCATCACGCCACAGTTTC               |
| BTG2-F                                   | CATCATCAGCAGGGTGGC                |
| BTG2-R                                   | CCCAATGCGGTAGGACAC                |
| hsa circ 0069382-F                       | CACTGAGAGCTGAATTGTGGG             |
| hsa circ 0069382-R                       | TTAAGATGTTTCAGGAGGTGCAG           |
| hsa circ 0002319-F                       | CATTTGGCCAATCATGTGCGA             |
| hsa circ 0002319-R                       | GACCTTTGTTGGTTTCTGCCC             |
| hsa circ 0004206-F                       | GCTTTCTGGGGAGTGAACAGT             |
| hsa circ 0004206-R                       | ACTCTGGGTGTGTTTCATCCTC            |
| hsa circ 0055954-F                       | AGAGAAACCCAAATCAGCCAT             |
| hsa circ 0055954-R                       | GGGTGGCAGAATGAACCAA               |
| hsa circ 0006278-F                       | TCTAAGTGGGAATCATTTCAGGTC          |
| hsa circ 0006278-R                       | AGGTTATGGAAGTGGATCCTTCC           |
| TBC1D19-F                                | TGGCCAGTCTTCAGAGACC               |
| TBC1D19-R                                | GGTGCAGCAGGATGACTAGG              |
|                                          |                                   |
| <b>inhibitor and mimics sequences</b>    |                                   |
| miR-15a-5p inhibitor                     | CACAAACCAUUAUGUGCUGCUA            |
| inhibitor NC                             | CAGUACUUUUGUGUAGUACAA             |
| miR-15a-5p mimics sense                  | UAGCAGCACAUAAUGGUUUGUG            |
| miR-15a-5p mimics antisense              | CAAACCAUUAUGUGCUGCUAAU            |
| mimics NC sense                          | UUCUCCGAACGUGUCACGUTT             |
| mimics NC antisense                      | ACGUGACACGUUCGGAGAATT             |
| GAPDH positive control sense             | UGACCUCAACUACAUGGUUTT             |
| GAPDH positive control antisense         | AACCAUGUAGUUGAGGUCATT             |
|                                          |                                   |
| <b>FISH probe sequences</b>              |                                   |
| miR-15a-5p-Cy3 probe                     | CACA+AACCATTA+TGTGCTGCTA          |
| 18S-Cy3 probe                            | CTGCCTTCCTTGGATGTGGTAGCCGTTTC     |
| NC-Cy3 probe                             | TGCTTTGCACGGTAACGCCTGTTTT         |
| hsa circ 0069382-FAM probe               | G+TAAAGGAACT+TTA+TAGAT+TAGAC      |
|                                          |                                   |
| <b>Lentivirus insertion sequences</b>    |                                   |
| LV3-hsa-miR-15a-5p mimics                | TAGCAGCACATAATGGTTTGTG            |
| LV3-NC                                   | TTCTCCGAACGTGTACGT                |
|                                          |                                   |
|                                          |                                   |
|                                          |                                   |
| <b>Antibodys</b>                         |                                   |
| GAPDH                                    | Cell Signaling Technology(2118S)  |
| BTG2                                     | proteintech (22339-1-AP)          |
| BTG2                                     | abcam (ab197362)                  |
| FAK                                      | Cell Signaling Technology (3285T) |
| IgG (H+L) Secondary Antibody,HR          | Invitrogen (32460)                |



| <b>Table S6 Potential IRES for hsa_circ_0069382</b>                  |                     |                |                                                                                                       |
|----------------------------------------------------------------------|---------------------|----------------|-------------------------------------------------------------------------------------------------------|
| <b>Sequences producing significant alignments</b>                    | <b>Score (bits)</b> | <b>E Value</b> | <b>site</b>                                                                                           |
| IRESite_Id:625 SINV1_IGRpred virus                                   | 29                  | 3.5            | Query: 89 aaaagaatttgaaga 104<br>                               <br>Sbjct: 7874 aaaagaatttgaaga 7859  |
| IRESite_Id:342 Apaf-1 gene                                           | 28                  | 12             | Query: 250 ggattttcttgaggt 264<br>                               <br>Sbjct: 4225 ggattttcttgaggt 4211 |
| IRESite_Id:1 HIF1a gene                                              | 26                  | 39             | Query: 325 tttgggttaattc 338<br>                               <br>Sbjct: 2413 tttgggttaattc 2400     |
| IRESite_Id:637 EV71_1-748 virus                                      | 26                  | 39             | Query: 280 caaccCAAattatg 293<br>                               <br>Sbjct: 3265 caaccCAAattatg 3278   |
| IRESite_Id:37 BVDV1_29-391 virus                                     | 26                  | 39             | Query: 468 tacgtattgggcaa 481<br>                               <br>Sbjct: 30 tacgtattgggcaa 43       |
| IRESite_Id:37 BVDV1_1-385 virus                                      | 26                  | 39             | Query: 468 tacgtattgggcaa 481<br>                               <br>Sbjct: 30 tacgtattgggcaa 43       |
| IRESite_Id:9 plasmid pBi5_BVDV with functional BVDV1 IRES from B...  | 26                  | 39             | Query: 468 tacgtattgggcaa 481<br>                               <br>Sbjct: 3981 tacgtattgggcaa 3994   |
| IRESite_Id:18 plasmid ORF(delta386-901) with defective BVDV1_del...  | 26                  | 39             | Query: 468 tacgtattgggcaa 481<br>                               <br>Sbjct: 3981 tacgtattgggcaa 3994   |
| IRESite_Id:17 plasmid IIIe(delta323-337) with defective BVDV1_de...  | 26                  | 39             | Query: 468 tacgtattgggcaa 481<br>                               <br>Sbjct: 3981 tacgtattgggcaa 3994   |
| IRESite_Id:16 plasmid IIIId(delta266-293) with defective BVDV1_de... | 26                  | 39             | Query: 468 tacgtattgggcaa 481<br>                               <br>Sbjct: 3981 tacgtattgggcaa 3994   |
| IRESite_Id:15 plasmid IIIc(delta245-254) with defective BVDV1_de...  | 26                  | 39             | Query: 468 tacgtattgggcaa 481<br>                               <br>Sbjct: 3981 tacgtattgggcaa 3994   |
| IRESite_Id:22 plasmid IIIb-c(In237-244) with defective BVDV1_in2...  | 26                  | 39             | Query: 468 tacgtattgggcaa 481<br>                               <br>Sbjct: 3981 tacgtattgggcaa 3994   |

|                                                                     |    |    |                                                                         |
|---------------------------------------------------------------------|----|----|-------------------------------------------------------------------------|
| IRESite_Id:21 plasmid IIIb(In225-228) with defective BVDV1_in225... | 26 | 39 | Query: 468 tacgtattgggcaa 481<br>   <br>Sbjct: 3981 tacgtattgggcaa 3994 |
| IRESite_Id:14 plasmid IIIb(delta208-223) with defective BVDV1_de... | 26 | 39 | Query: 468 tacgtattgggcaa 481<br>   <br>Sbjct: 3981 tacgtattgggcaa 3994 |
| IRESite_Id:20 plasmid IIIa(In170-173) with defective BVDV1_in170... | 26 | 39 | Query: 468 tacgtattgggcaa 481<br>   <br>Sbjct: 3981 tacgtattgggcaa 3994 |
| IRESite_Id:19 plasmid IIa-b(In102-105) with defective BVDV1_in10... | 26 | 39 | Query: 468 tacgtattgggcaa 481<br>   <br>Sbjct: 3981 tacgtattgggcaa 3994 |
| IRESite_Id:12 plasmid II(delta78-137) with defective BVDV1_delta... | 26 | 39 | Query: 468 tacgtattgggcaa 481<br>   <br>Sbjct: 3981 tacgtattgggcaa 3994 |
| IRESite_Id:23 plasmid Ib(In63-66) with functional BVDV1_in63-66 ... | 26 | 39 | Query: 468 tacgtattgggcaa 481<br>   <br>Sbjct: 3981 tacgtattgggcaa 3994 |
| IRESite_Id:24 plasmid AUG(In375-378) with defective BVDV1_in375-... | 26 | 39 | Query: 468 tacgtattgggcaa 481<br>   <br>Sbjct: 3981 tacgtattgggcaa 3994 |

| <b>Table S7 Potential ORFs for hsa_circ_0069382</b> |               |              |              |             |                         |     |
|-----------------------------------------------------|---------------|--------------|--------------|-------------|-------------------------|-----|
| <b>Label</b>                                        | <b>Strand</b> | <b>Frame</b> | <b>Start</b> | <b>Stop</b> | <b>Length (nt   aa)</b> |     |
| ORF1                                                | +             | 2            | 62           | >673        | 612                     | 203 |
| ORF2                                                | -             | 1            | 643          | 488         | 156                     | 51  |
